# Supplementary material for: T and NK Cells in IL2RG-Deficient Patient 50 Years After Hematopoietic Stem Cell Transplantation
Source: PubMed Central journal article supplement (PMC9537207; doi:10.1007/s10875-022-01279-5), 2022-05-09
Supplement: 10875_2022_1279_MOESM1_ESM.pdf [file 10875_2022_1279_MOESM1_ESM.pdf]

**Table S1 Antibodies**

**A. Antibodies conventional flow cytometry**

| Specificity    |                  | Antibody characteristics |             |           |                  |          |
|----------------|------------------|--------------------------|-------------|-----------|------------------|----------|
| CD designation | Alternative name | Fluorochrome             | Isotype     | Clone     | Company          | Catalog# |
|                | Vb5.3            | PE                       | mouse IgG1  | 3D11      | Beckman Coulter  | IM3497   |
|                | Vb7.1            | PE+FITC                  | mouse IgG2a | ZOE       | Beckman Coulter  | IM3497   |
|                | Vb3              | FITC                     | mouse IgM   | CH92      | Beckman Coulter  | IM3497   |
|                | Vb9              | PE                       | mouse IgG2a | FIN9      | Beckman Coulter  | IM3497   |
|                | Vb17             | PE+FITC                  | mouse IgG1  | E17.5F3   | Beckman Coulter  | IM3497   |
|                | Vb16             | FITC                     | mouse IgG1  | TAMAYA1.2 | Beckman Coulter  | IM3497   |
|                | Vb18             | PE                       | mouse IgG1  | BA62.6    | Beckman Coulter  | IM3497   |
|                | Vb5.1            | PE+FITC                  | mouse IgG2a | IMMU157   | Beckman Coulter  | IM3497   |
|                | Vb20             | FITC                     | mouse IgG2a | ELL1.4    | Beckman Coulter  | IM3497   |
|                | Vb13.1           | PE                       | mouse IgG2b | IMMU222   | Beckman Coulter  | IM3497   |
|                | Vb13.6           | PE+FITC                  | mouse IgG1  | JU74.3    | Beckman Coulter  | IM3497   |
|                | Vb8              | FITC                     | mouse IgG2a | 56C5.2    | Beckman Coulter  | IM3497   |
|                | Vb5.2            | PE                       | mouse IgG1  | 36213     | Beckman Coulter  | IM3497   |
|                | Vb20             | PE+FITC                  | mouse IgG1  | MPB2D5    | Beckman Coulter  | IM3497   |
|                | Vb12             | FITC                     | mouse IgG2a | VER2.32   | Beckman Coulter  | IM3497   |
|                | Vb23             | PE                       | mouse IgG1  | AF23      | Beckman Coulter  | IM3497   |
|                | Vb1              | PE+FITC                  | rat IgG1    | BL37.2    | Beckman Coulter  | IM3497   |
|                | Vb21.3           | FITC                     | mouse IgG2a | IG125     | Beckman Coulter  | IM3497   |
|                | Vb11             | PE                       | mouse IgG2a | C21       | Beckman Coulter  | IM3497   |
|                | Vb22             | PE+FITC                  | mouse IgG1  | IMMU546   | Beckman Coulter  | IM3497   |
|                | Vb14             | FITC                     | mouse IgG1  | CAS1.1.3  | Beckman Coulter  | IM3497   |
|                | Vb13.2           | PE                       | mouse IgG1  | H132      | Beckman Coulter  | IM3497   |
|                | Vb4              | PE+FITC                  | rat IgM     | WJF24     | Beckman Coulter  | IM3497   |
|                | Vb7.2            | FITC                     | mouse IgG2a | ZIZOU4    | Beckman Coulter  | IM3497   |
| CD3            | CD3              | BV510                    | mouse IgG1  | UCHT1     | Biolegend        | 300448   |
| CD4            | CD4              | AF700                    | mouse IgG1  | SK3       | Biolegend        | 344622   |
| CD8            | CD8              | PE-Cy7                   | mouse IgG1  | SK1       | Becton Dickinson | 335822   |
| CD27           | CD27             | BV421                    | mouse IgG1  | M-T271    | Becton Dickinson | 562513   |
| CD28           | CD28             | PE-Cy5.5                 | mouse IgG1  | CD28.2    | Beckman Coulter  | B24027   |
| CD45RA         | PTPRC            | ECD                      | mouse IgG2b | MEM-56    | Invitrogen       | 335039   |
| CD197          | CCR7             | APC-Cy7                  | mouse IgG2a | G043H7    | Biolegend        | 353212   |
| CD297          | PD-1             | BV711                    | mouse IgG1  | EH12.1    | Becton Dickinson | 564017   |
|                | TIGIT            | APC                      | mouse IgG1  | MBSA43    | eBioscience      | 179500   |

**B. Antibodies spectral cytometry**

| Specificity    |                  | Antibody characteristics |             |             |                  |            |
|----------------|------------------|--------------------------|-------------|-------------|------------------|------------|
| CD designation | Alternative name | Fluorochrome             | Isotype     | Clone       | Company          | Catalog#   |
|                | Vb5.3            | PE                       | mouse IgG1  | 3D11        | Beckman Coulter  | IM3497     |
|                | Vb7.1            | PE+FITC                  | mouse IgG2a | ZOE         | Beckman Coulter  | IM3497     |
|                | Vb3              | FITC                     | mouse IgM   | CH92        | Beckman Coulter  | IM3497     |
|                | Vb9              | PE                       | mouse IgG2a | FIN9        | Beckman Coulter  | IM3497     |
|                | Vb17             | PE+FITC                  | mouse IgG1  | E17.5F3     | Beckman Coulter  | IM3497     |
|                | Vb16             | FITC                     | mouse IgG1  | TAMAYA1.2   | Beckman Coulter  | IM3497     |
|                | Vb18             | PE                       | mouse IgG1  | BA62.6      | Beckman Coulter  | IM3497     |
|                | Vb5.1            | PE+FITC                  | mouse IgG2a | IMMU157     | Beckman Coulter  | IM3497     |
|                | Vb20             | FITC                     | mouse IgG2a | ELL1.4      | Beckman Coulter  | IM3497     |
|                | Vb13.1           | PE                       | mouse IgG2b | IMMU222     | Beckman Coulter  | IM3497     |
|                | Vb13.6           | PE+FITC                  | mouse IgG1  | JU74.3      | Beckman Coulter  | IM3497     |
|                | Vb8              | FITC                     | mouse IgG2a | 56C5.2      | Beckman Coulter  | IM3497     |
|                | Vb5.2            | PE                       | mouse IgG1  | 36213       | Beckman Coulter  | IM3497     |
|                | Vb20             | PE+FITC                  | mouse IgG1  | MPB2D5      | Beckman Coulter  | IM3497     |
|                | Vb12             | FITC                     | mouse IgG2a | VER2.32     | Beckman Coulter  | IM3497     |
|                | Vb23             | PE                       | mouse IgG1  | AF23        | Beckman Coulter  | IM3497     |
|                | Vb1              | PE+FITC                  | rat IgG1    | BL37.2      | Beckman Coulter  | IM3497     |
|                | Vb21.3           | FITC                     | mouse IgG2a | IG125       | Beckman Coulter  | IM3497     |
|                | Vb11             | PE                       | mouse IgG2a | C21         | Beckman Coulter  | IM3497     |
|                | Vb22             | PE+FITC                  | mouse IgG1  | IMMU546     | Beckman Coulter  | IM3497     |
|                | Vb14             | FITC                     | mouse IgG1  | CAS1.1.3    | Beckman Coulter  | IM3497     |
|                | Vb13.2           | PE                       | mouse IgG1  | H132        | Beckman Coulter  | IM3497     |
|                | Vb4              | PE+FITC                  | rat IgM     | WJF24       | Beckman Coulter  | IM3497     |
|                | Vb7.2            | FITC                     | mouse IgG2a | ZIZOU4      | Beckman Coulter  | IM3497     |
| CD3            |                  | BV480                    | mouse IgG1  | UCHT1       | Becton Dickinson | 566105     |
| CD4            |                  | AF532                    | mouse IgG1  | SK3         | ThermoFisher     | 58-0047-42 |
| CD4            |                  | APC-H7                   | mouse IgG1  | RPA-T4      | Becton Dickinson | 560158     |
| CD7            |                  | AF532                    | mouse IgG1  | eBio124-1D1 | eBioscience      | 58-0079-42 |

|              |                           |              |             |            |                  |             |
|--------------|---------------------------|--------------|-------------|------------|------------------|-------------|
| CD8          |                           | AF700        | mouse IgG1  | SK1        | Biologend        | 344724      |
| CD8          |                           | BV605        | mouse IgG1  | SK1        | Becton Dickinson | 564116      |
| CD16         | FCGR3A                    | BV711        | mouse IgG1  | 3G8        | Becton Dickinson | 563127      |
| CD16         | FCGR3A                    | Vio515       | mouse IgG1  | REA423     | Miltenyi         | 130-119-616 |
| CD27         | TNFRSF7                   | APC-Fire810  | mouse IgG1  | QA17A18    | Biologend        | 393214      |
| CD27         | TNFRSF7                   | BV605        | mouse IgG1  | L128       | Becton Dickinson | 562655      |
| CD28         |                           | BV750        | mouse IgG1  | CD28.2     | Becton Dickinson | 747329      |
| CD28         |                           | BUV661       | mouse IgG1  | CD28.2     | Becton Dickinson | 741635      |
| CD45         |                           | APC-H7       | mouse IgG1  | 2D1        | Becton Dickinson | 641417      |
| CD45RA       |                           | BV570        | mouse IgG2b | HI100      | Biologend        | 304132      |
| CD56         | NCAM                      | BV650        | mouse IgG2b | NCAM16.2   | Becton Dickinson | 564057      |
| CD159a       | NKG2A                     | PE           | mouse IgG2b | Z199       | Beckman Coulter  | IM3291U     |
| CD103        | ITGAE                     | FITC         | mouse IgG1  | BER-ACT8   | DAKO             | F7138       |
| CD186        | CXCR6                     | BV421        | mouse IgG2a | K041E5     | Biologend        | 356014      |
| CD127        | IL7R                      | SB436        | mouse IgG1  | eBioRDR5   | Thermofisher     | 62-1278-42  |
| CD57         | B3GAT1                    | PB           | mouse IgM   | HNK1       | Biologend        | 359608      |
| CD62L        | SELL                      | BV605        | mouse IgG1  | DREG-56    | Biologend        | 304834      |
| CD69         |                           | BUV805       | mouse IgG1  | FN50       | Biologend        | 748763      |
| CD69         |                           | PE-Cy7       | mouse IgG1  | FN50       | Biologend        | 310912      |
| CD95         | FAS                       | PE-Dazzle594 | mouse IgG1  | DX2        | Biologend        | 305634      |
| CD107a       | LAMP1                     | FITC         | mouse IgG1  | H4A3       | Becton Dickinson | 555800      |
| CD127        | IL7Ra                     | PE-Cy5.5     | mouse IgG1  | eBioRDR5   | eBioscience      | 35-1278-42  |
| CD158a+h     | KIR2DL1, KIR2DS1          | PE           | mouse IgG1  | EB6        | Beckman Coulter  | A09778      |
| CD158b1+b2+j | KIR2DL2, KIR2DL3, KIR2DS2 | PE           | mouse IgG1  | GL183      | Beckman Coulter  | IM2278U     |
| CD158e1      | KIR3DL1                   | PE           | mouse IgG1  | DX9        | Becton Dickinson | 555967      |
| CD158i       | KIR2DS4                   | PE           | mouse IgG2a | FES172     | Beckman Coulter  | IM3337      |
| CD159a       | NKG2A                     | APC          | mouse IgG2b | Z199       | Beckman Coulter  | A60797      |
| CD159a       | NKG2A                     | PE-Cy7       | mouse IgG2b | Z199       | Beckman Coulter  | B10246      |
| CD159c       | NKG2C                     | AF700        | mouse IgG1  | 134591     | R&D Systems      | FAB138N-100 |
| CD197        | CCR7                      | APC-Fire750  | mouse IgG2a | G043H7     | Biologend        | 353246      |
| CD226        | DNAM-1                    | BUV563       | mouse IgG1  | DX11       | Becton Dickinson | 748429      |
| CD226        | DNAM-1                    | BB700        | mouse IgG1  | DX11       | Becton Dickinson | 745864      |
| CD279        | PD-1                      | BV711        | mouse IgG1  | EH12.1     | Becton Dickinson | 564017      |
| CD314        | NKG2D                     | APC          | mouse IgG1  | 1D11       | Becton Dickinson | 558071      |
| CD335        | NKp46                     | unconjugated | mouse IgG1  | 9E2        | BD               | 557911      |
|              | CCL4                      | PerCP-ef710  | mouse IgG2a | FL34Z3L    | eBioscience      | 46-7540-42  |
|              | CLA                       | APC          | rat IgM     | HECA-452   | Miltenyi         | 130-098-573 |
|              | CX3CR1                    | BV785        | mouse IgG2b | 2A9-1      | Becton Dickinson | 744489      |
|              | IFN- $\gamma$             | PE-Dazzle594 | mouse IgG1  | 4S.B3      | Biologend        | 502546      |
|              | IFN- $\gamma$             | PE           | mouse IgG1  | 4S.B3      | Becton Dickinson | 554552      |
|              | KLRG1                     | PerCP-ef710  | mouse IgG2a | 13F12F2    | Thermofisher     | 46-9488-42  |
|              | TCRgd                     | BV510        | mouse IgG1  | 11F2       | Becton Dickinson | 745026      |
|              | TIGIT                     | AF647        | mouse IgG1  | MBSA43     | eBioscience      | 51-9500-42  |
|              | TNF- $\alpha$             | AF700        | mouse IgG1  | Mab11      | Biologend        | 502928      |
|              | XCL1                      | uncojugated  | goat IgG    | polyclonal | R&D Systems      | AF695       |
| Secondary    | Mouse IgG1                | AF594        | goat IgG    | polyclonal | Invitrogen       | A-21125     |
| Secondary    | Goat IgG                  | AF488        | donkey IgG  | polyclonal | Invitrogen       | A-11055     |

### C. Antibodies T cell panel sorting

| Specificity    |                  | Antibody characteristics |             |        |                  |             |
|----------------|------------------|--------------------------|-------------|--------|------------------|-------------|
| CD designation | Alternative name | Fluorochrome             | Isotype     | Clone  | Company          | Catalog#    |
| CD3            |                  | BV510                    | mouse IgG1  | UCHT1  | Biologend        | 300448      |
| CD4            |                  | PE-Cy5.5                 | mouse IgG1  | 13B8.2 | Beckman Coulter  | B16491      |
| CD8            |                  | APC-H7                   | mouse IgG1  | SK1    | Becton Dickinson | 560179      |
| CD27           | TNFRSF7          | BV421                    | mouse IgG1  | M-T271 | Becton Dickinson | 562513      |
| CD28           |                  | APC                      | mouse IgG1  | CD28.2 | Biologend        | 302912      |
| CD31           | PECAM-1          | PE                       | mouse IgG1  | MEM-05 | Exbio            | 1P-273-T100 |
| CD45RA         |                  | PE-TxR                   | mouse IgG2b | MEM-56 | Invitrogen       | MHCD45RA17  |
| CD197          | CCR7             | FITC                     | mouse IgG2a | 150503 | R&D Systems      | FAB197F-100 |

**Table S2 peptides**

|    | <b>Sequence</b>           | <b>Region</b>   |
|----|---------------------------|-----------------|
| 1  | SKVYLPPTPVSKVISTDVYVTRTNV | L1 HPV2 25-126  |
| 2  | TDVYVTRTNVYYHGGSSRLLTVGHP | L1 HPV2 25-126  |
| 3  | SSRLLTVGHPYYSIKKSNNKVAVPK | L1 HPV2 25-126  |
| 4  | KSNNKVAVPKVSGYQYRVFHVKLPD | L1 HPV2 25-126  |
| 5  | YRVFHVKLPDPNKFGLPDADLYDPD | L1 HPV2 25-126  |
| 6  | LPDADLYDPDTQRLLWACVGVEVGR | L1 HPV2 25-126  |
| 7  | AAEPYGDSMFFSLRREQMFTRHFFN | L1 HPV2 250-351 |
| 8  | EQMFTRHFFNLGGKMGDTIPDELYI | L1 HPV2 250-351 |
| 9  | GDTIPDELYIKSTSVPTPGSHVYTS | L1 HPV2 250-351 |
| 10 | PTPGSHVYTSTPSGSMVSSEQQLFN | L1 HPV2 250-351 |
| 11 | MVSSEQQLFNKPYWLRRAQGHNNGM | L1 HPV2 250-351 |
| 12 | RRAQGHNNGMCWGNRVFLTVVDTTR | L1 HPV2 250-351 |
| 13 | QDTYRYLQSQAITCQKTPPKTPTD  | L1 HPV2 425-449 |

**Table S3 QC metrics TRB sequencing**

| Sample                       | raw sequences | useable sequences | productive sequences | clonotypes |
|------------------------------|---------------|-------------------|----------------------|------------|
| UPN1 HPV- T cell cultured    | 84591         | 84090             | 80528                | 197        |
| UPN1 HPV +/- T cell cultured | 93102         | 92468             | 64169                | 250        |
| UPN1 HPV+ T cell cultured    | 69249         | 68709             | 51521                | 359        |
| UPN1 HPV+ skin               | 90948         | 87527             | 59195                | 337        |
| UPN1 CD4 memory              | 99182         | 98583             | 87192                | 3308       |
| UPN1 CD4 naive               | 97713         | 97111             | 79872                | 7857       |
| UPN1 CD8 memory              | 94810         | 94187             | 71031                | 1321       |
| UPN1 CD8 naive               | 90857         | 90302             | 72635                | 7449       |
| HC CD4 memory                | 102501        | 102082            | 91499                | 3607       |
| HC CD4 naive                 | 79053         | 78410             | 64530                | 8891       |
| HC CD8 memory                | 77150         | 76386             | 48413                | 984        |
| HC CD8 naive                 | 84738         | 84183             | 66778                | 5578       |
| UPN1 peptide 11              | 45791         | 36606             | 14841                | 107        |
| UPN1 peptide 12              | 47715         | 37858             | 14704                | 105        |

Table S4. Input Vbeta populations per sample

| Total       |        |        |        |        |
|-------------|--------|--------|--------|--------|
| vb          | UPN1_1 | UPN1_2 | UPN1_3 | HD     |
| TCRA_vb3    | 1282   | 2440   | 7720   | 10323  |
| TCRA_vb5.3  | 89     | 200    | 761    | 858    |
| TCRA_vb7.1  | 161    | 448    | 725    | 1326   |
| TCRA_vbneg  | 24842  | 106717 | 144780 | 124658 |
| TCRB_vb16   | 57     | 291    | 388    | 1232   |
| TCRB_vb17   | 566    | 3172   | 5331   | 4698   |
| TCRB_vb9    | 313    | 830    | 1244   | 2326   |
| TCRB_vbneg  | 25439  | 105512 | 147024 | 128911 |
| TCRC_vb18   | 168    | 483    | 860    | 344    |
| TCRC_vb20   | 88     | 198    | 508    | 2550   |
| TCRC_vb5.1  | 815    | 3053   | 2992   | 4056   |
| TCRC_vbneg  | 25304  | 106069 | 149627 | 130216 |
| TCRD_vb13.1 | 849    | 2434   | 2617   | 3497   |
| TCRD_vb13.6 | 258    | 1327   | 1870   | 1885   |
| TCRD_vb8    | 856    | 2746   | 7046   | 3970   |
| TCRD_vbneg  | 24412  | 103298 | 142455 | 127816 |
| TCRE_vb12   | 1324   | 4040   | 1304   | 1979   |
| TCRE_vb2    | 2373   | 6737   | 6577   | 10757  |
| TCRE_vb5.2  | 91     | 198    | 3361   | 821    |
| TCRE_vbneg  | 22585  | 98830  | 142743 | 123610 |
| TCRF_vb1    | 374    | 1168   | 1902   | 4656   |
| TCRF_vb21.3 | 259    | 1233   | 1392   | 1882   |
| TCRF_vb23   | 77     | 192    | 496    | 684    |
| TCRF_vbneg  | 25665  | 107213 | 150196 | 129946 |
| TCRG_vb11   | 191    | 393    | 860    | 1493   |
| TCRG_vb14   | 648    | 3867   | 2683   | 5209   |
| TCRG_vb22   | 305    | 2486   | 3704   | 3682   |
| TCRG_vbneg  | 25231  | 103059 | 146740 | 126782 |
| TCRH_vb13.2 | 305    | 796    | 3065   | 3898   |
| TCRH_vb4    | 948    | 3636   | 11982  | 2988   |
| TCRH_vb7.2  | 269    | 871    | 1300   | 1961   |
| TCRH_vbneg  | 24853  | 104502 | 137640 | 128320 |

| Total | 210997 | 878439 | 1231893 | 1097334 | 3418663 |
|-------|--------|--------|---------|---------|---------|
| A     | 26374  | 109805 | 153986  | 137165  |         |
| B     | 26375  | 109805 | 153987  | 137167  |         |
| C     | 26375  | 109803 | 153987  | 137166  |         |
| D     | 26375  | 109805 | 153988  | 137168  |         |
| E     | 26373  | 109805 | 153985  | 137167  |         |
| F     | 26375  | 109806 | 153986  | 137168  |         |
| G     | 26375  | 109805 | 153987  | 137166  |         |
| H     | 26375  | 109805 | 153987  | 137167  |         |

| CD4         |        |        |        |       |
|-------------|--------|--------|--------|-------|
| vb          | UPN1_1 | UPN1_2 | UPN1_3 | HD    |
| TCRA_vb3    | 1135   | 1791   | 3697   | 6650  |
| TCRA_vb5.3  | 80     | 172    | 496    | 585   |
| TCRA_vb7.1  | 85     | 164    | 486    | 742   |
| TCRA_vbneg  | 14008  | 38350  | 67045  | 71953 |
| TCRB_vb16   | 274    | 625    | 1096   | 1774  |
| TCRB_vb17   | 52     | 206    | 299    | 978   |
| TCRB_vb9    | 150    | 360    | 4130   | 3555  |
| TCRB_vbneg  | 14935  | 39593  | 64977  | 72519 |
| TCRC_vb18   | 341    | 747    | 1659   | 3276  |
| TCRC_vb20   | 164    | 465    | 822    | 312   |
| TCRC_vb5.1  | 67     | 151    | 444    | 1847  |
| TCRC_vbneg  | 14818  | 38628  | 68933  | 73760 |
| TCRD_vb13.1 | 741    | 2180   | 1537   | 2984  |
| TCRD_vb13.6 | 759    | 1669   | 2345   | 2708  |
| TCRD_vb8    | 154    | 424    | 1517   | 1450  |
| TCRD_vbneg  | 14028  | 36124  | 67003  | 72746 |
| TCRE_vb12   | 2097   | 4817   | 4620   | 8010  |
| TCRE_vb2    | 87     | 173    | 310    | 644   |
| TCRE_vb5.2  | 141    | 274    | 665    | 1172  |
| TCRE_vbneg  | 12982  | 34817  | 64958  | 70208 |
| TCRF_vb1    | 211    | 478    | 1217   | 2312  |
| TCRF_vb21.3 | 214    | 537    | 531    | 1298  |
| TCRF_vb23   | 55     | 108    | 304    | 362   |
| TCRF_vbneg  | 15164  | 39824  | 71112  | 76212 |
| TCRG_vb11   | 134    | 214    | 469    | 676   |
| TCRG_vb14   | 131    | 319    | 737    | 2785  |
| TCRG_vb22   | 173    | 487    | 1015   | 2172  |
| TCRG_vbneg  | 15119  | 41489  | 72202  | 74857 |
| TCRH_vb13.2 | 867    | 3215   | 11548  | 2020  |
| TCRH_vb4    | 188    | 318    | 685    | 1014  |
| TCRH_vb7.2  | 222    | 430    | 2296   | 2467  |
| TCRH_vbneg  | 14478  | 37985  | 60117  | 75035 |

| Total | 124054 | 327134 | 579272 | 639083 | 1669534 |
|-------|--------|--------|--------|--------|---------|
| A     | 15308  | 40477  | 71724  | 79930  |         |
| B     | 15411  | 40784  | 70502  | 78826  |         |
| C     | 15390  | 39991  | 71858  | 79195  |         |
| D     | 15682  | 40397  | 72402  | 79888  |         |
| E     | 15307  | 40081  | 70553  | 80034  |         |
| F     | 15644  | 40947  | 73164  | 80184  |         |
| G     | 15557  | 42509  | 74423  | 80490  |         |
| H     | 15755  | 41948  | 74646  | 80536  |         |

| CD8 & CD4-CD8- |        |        |        |       |
|----------------|--------|--------|--------|-------|
| vb             | UPN1_1 | UPN1_2 | UPN1_3 | HD    |
| TCRA_vb3       | 147    | 644    | 4017   | 3666  |
| TCRA_vb5.3     | 9      | 27     | 262    | 273   |
| TCRA_vb7.1     | 68     | 259    | 234    | 579   |
| TCRA_vbneg     | 7052   | 38527  | 61347  | 34194 |
| TCRB_vb16      | 39     | 196    | 143    | 548   |
| TCRB_vb17      | 5      | 85     | 89     | 252   |
| TCRB_vb9       | 416    | 2805   | 1195   | 1116  |
| TCRB_vbneg     | 6535   | 33994  | 65806  | 37638 |
| TCRC_vb18      | 474    | 2290   | 1326   | 768   |
| TCRC_vb20      | 4      | 15     | 27     | 29    |
| TCRC_vb5.1     | 21     | 47     | 63     | 699   |
| TCRC_vbneg     | 6644   | 37260  | 63549  | 37977 |
| TCRD_vb13.1    | 112    | 556    | 5503   | 963   |
| TCRD_vb13.6    | 88     | 757    | 269    | 786   |
| TCRD_vb8       | 104    | 897    | 349    | 421   |
| TCRD_vbneg     | 6656   | 36639  | 58504  | 36003 |
| TCRE_vb12      | 276    | 1913   | 1955   | 2735  |
| TCRE_vb2       | 4      | 24     | 3030   | 176   |
| TCRE_vb5.2     | 1183   | 3766   | 637    | 799   |
| TCRE_vbneg     | 5381   | 33221  | 60293  | 34146 |
| TCRF_vb1       | 162    | 690    | 685    | 2344  |
| TCRF_vb21.3    | 44     | 695    | 857    | 582   |
| TCRF_vb23      | 22     | 82     | 191    | 321   |
| TCRF_vbneg     | 6898   | 37889  | 63135  | 35664 |
| TCRG_vb11      | 56     | 177    | 386    | 643   |
| TCRG_vb14      | 514    | 3517   | 1900   | 2395  |
| TCRG_vb22      | 132    | 1986   | 2684   | 1501  |
| TCRG_vbneg     | 6196   | 30404  | 57447  | 33383 |
| TCRH_vb13.2    | 76     | 410    | 432    | 962   |
| TCRH_vb4       | 81     | 552    | 614    | 941   |
| TCRH_vb7.2     | 77     | 358    | 749    | 1376  |
| TCRH_vbneg     | 6742   | 36862  | 61123  | 34379 |

| Total | 56218 | 307544 | 518801 | 308259 | 1190822 |
|-------|-------|--------|--------|--------|---------|
| A     | 7276  | 39457  | 65860  | 38712  |         |
| B     | 6995  | 37080  | 67233  | 39554  |         |
| C     | 7143  | 39612  | 64965  | 39473  |         |
| D     | 6960  | 38849  | 64625  | 38173  |         |
| E     | 6844  | 38924  | 65915  | 37856  |         |
| F     | 7126  | 39356  | 64868  | 38911  |         |
| G     | 6898  | 36084  | 62417  | 37922  |         |
| H     | 6976  | 38182  | 62918  | 37658  |         |

**A UPN1**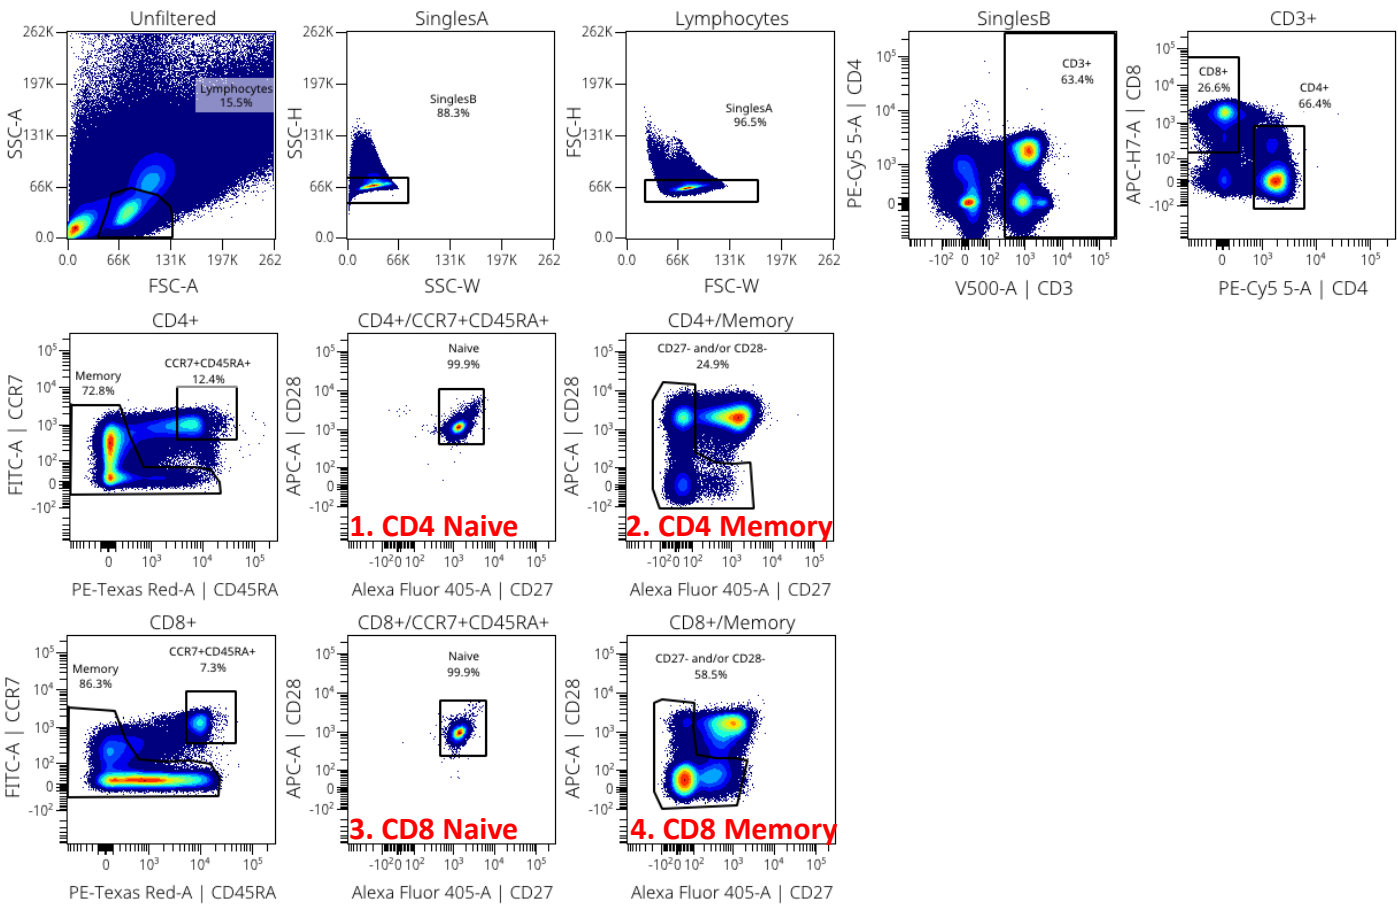**B Healthy control**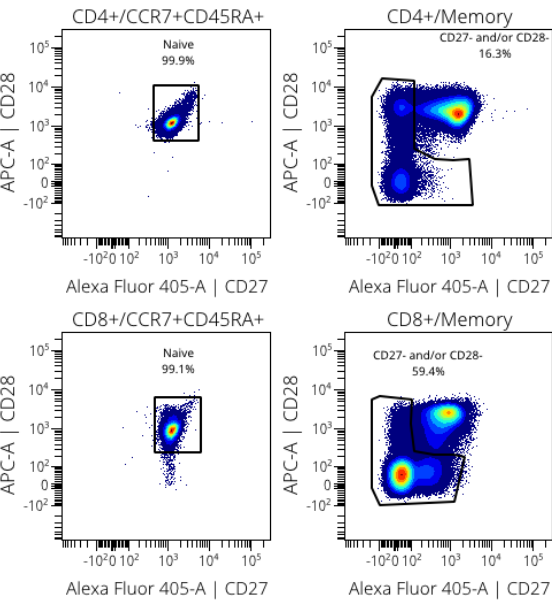**C Healthy donor**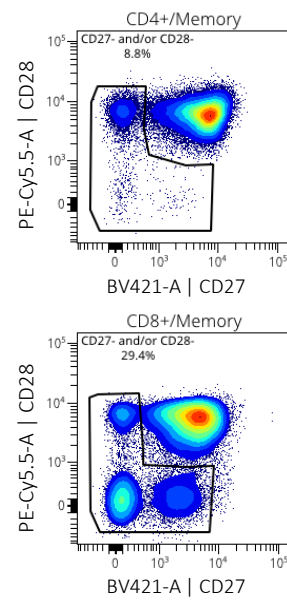**D**

|               | UPN1   | Healthy control |
|---------------|--------|-----------------|
| 1. CD4 Naive  | 530514 | 403768          |
| 2. CD4 Memory | 571955 | 170211          |
| 3. CD8 Naive  | 107628 | 83247           |
| 4. CD8 Memory | 638882 | 415016          |

**Figure S1. Gating strategy for sorting T cell populations for TCRB sequencing**

**A)** The gating strategy applied to sort the naive and CD27<sup>-</sup> and/or CD28<sup>-</sup> memory populations of CD4 and CD8 T cells is shown for UPN1. **B)** The sorted fractions of the age-matched healthy control. **C)** In comparison to UPN1 and the healthy control, the percentage of CD27<sup>-</sup> and/or CD28<sup>-</sup> memory T cells in the healthy donor was much lower. Because of limited available material, no sorting could be performed of a healthy donor sample. **D)** The total number of cells sorted for each individual population per sample.

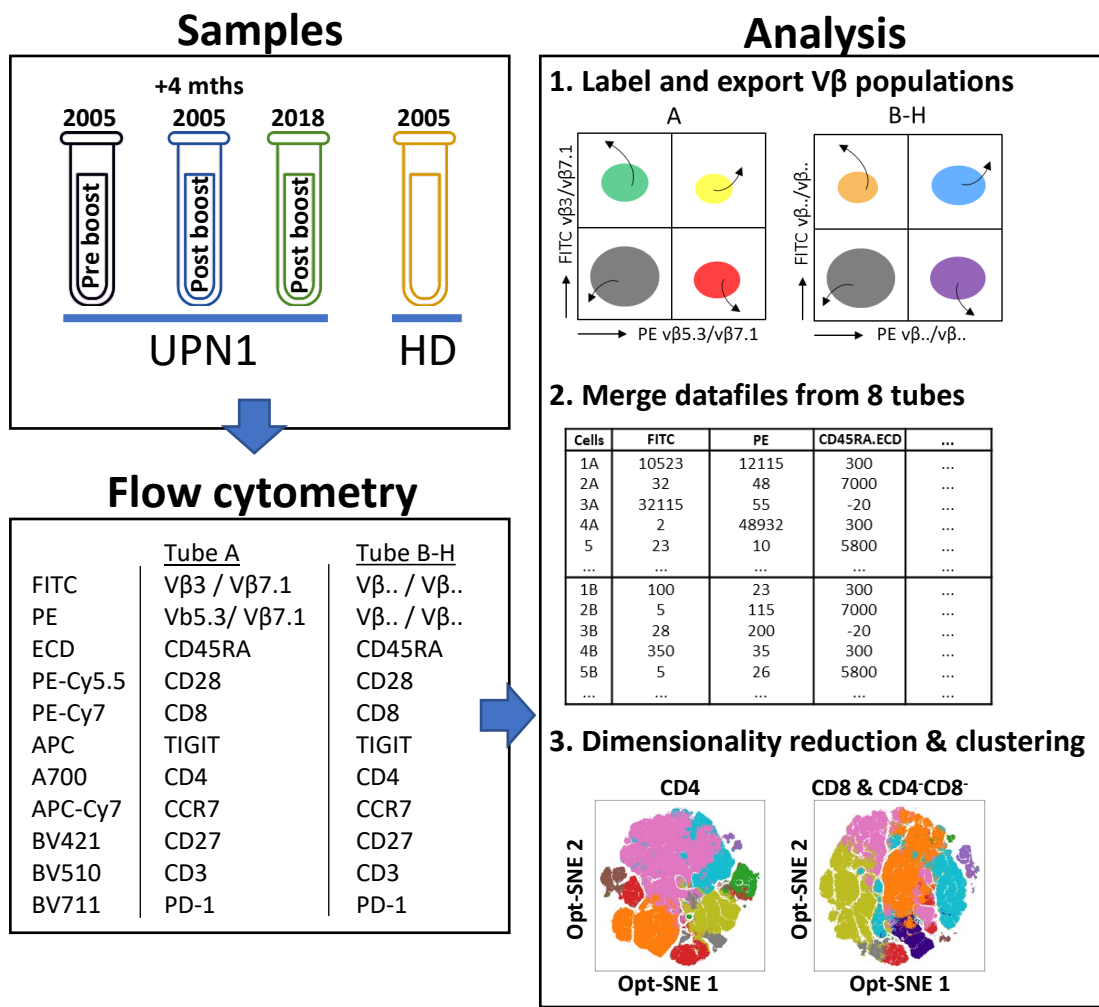

**Figure S2. Pipeline T cell receptor Vβ analysis combined with phenotyping**

PBMC from UPN1 (pre-boost, 4 months post-boost and 13 years after the boost) and his donor were phenotyped by flow cytometry. The panel consisted of 8 tubes, each including three Vβ antibodies and a backbone panel of lineage, differentiation and activation markers. Analysis was performed by pre-gating each individual Vβ population, after which the data from the 8 tubes were combined. Next, opt-SNE was performed as dimensionality reduction tool on the CD4 and CD8 & CD4<sup>-</sup>CD8<sup>-</sup> T cells. Clustering was performed by FlowSOM.

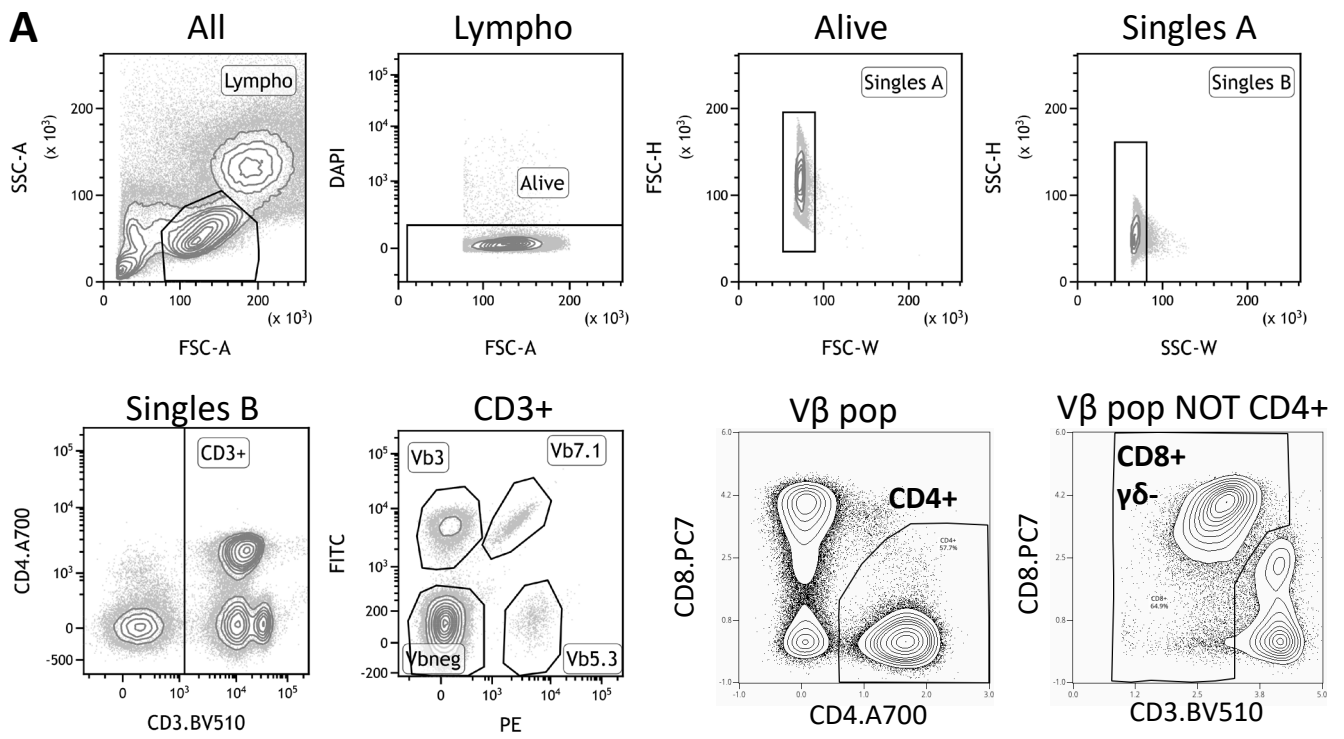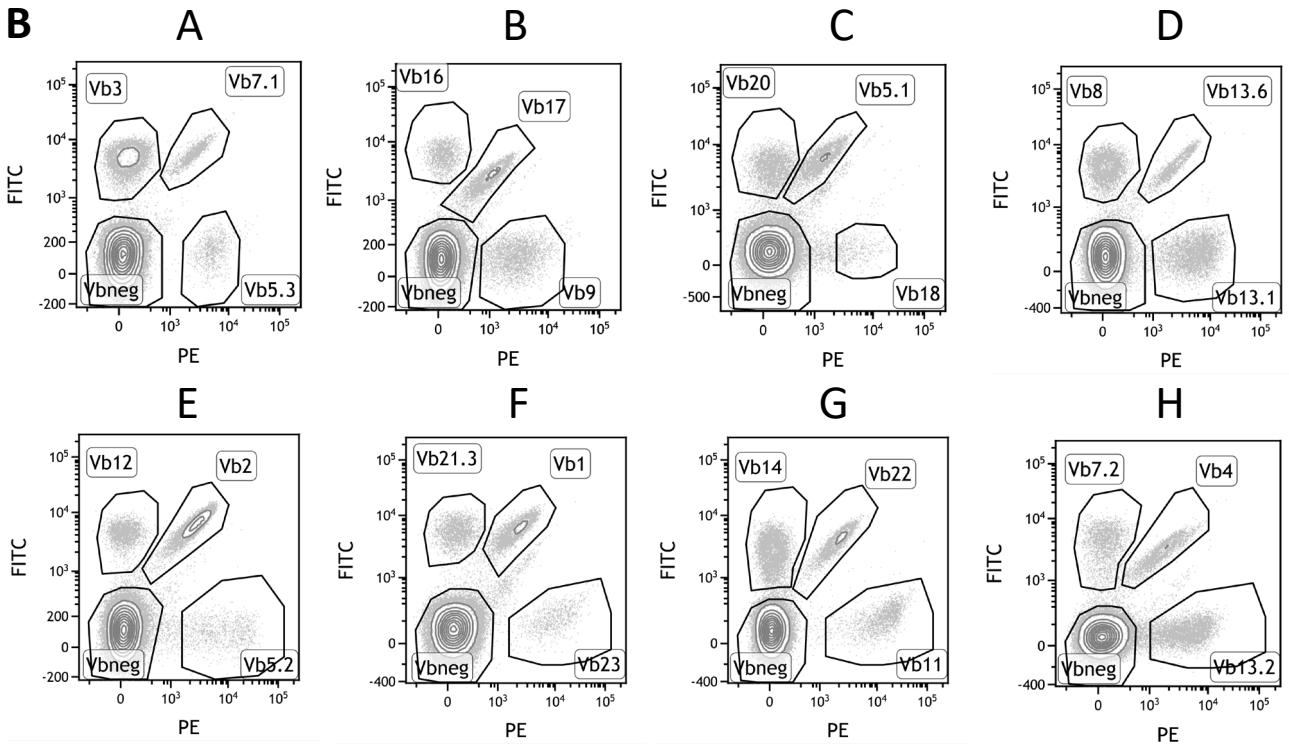

**Figure S3. Gating strategy for Vβ populations**

**A)** The gating strategy applied to select T cells includes selection of living single lymphocytes and subsequently T cells based on CD3 expression. The Vβ populations were selected based on FITC and PE expression (in this example tube A) and uploaded on the OMIQ platform. Next, each individual Vβ population was separated into a CD4<sup>+</sup> population and CD4<sup>-</sup>CD8<sup>+/-</sup> population. CD4<sup>-</sup>CD3<sup>high</sup> T cells were removed for further analysis since they are likely to represent γδ T cells. **B)** The gating strategy for selection of the Vβ populations for each individual tube is shown.



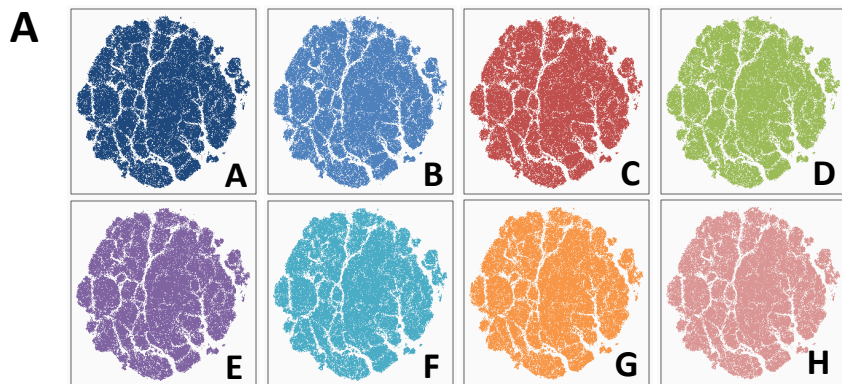

**B CD8 T cells**

|      | Cluster 1 | Cluster 2 | Cluster 3 | Cluster 4 | Cluster 5 | Cluster 6 | Cluster 7 | Cluster 8 | Cluster 9 | Cluster 10 |
|------|-----------|-----------|-----------|-----------|-----------|-----------|-----------|-----------|-----------|------------|
| TCRA | 32.3      | 0.4       | 3.79      | 2.23      | 0.46      | 17.8      | 2.04      | 22.3      | 13.9      | 4.77       |
| TCRB | 31.6      | 0.4       | 4.19      | 2.53      | 0.52      | 18.1      | 2.11      | 22        | 13.5      | 5.07       |
| TCRC | 31.7      | 0.42      | 4.03      | 2.46      | 0.48      | 17.8      | 2.12      | 22.4      | 13.7      | 4.89       |
| TCRD | 32.5      | 0.37      | 3.93      | 2.36      | 0.46      | 18.3      | 2.02      | 21.7      | 13.7      | 4.62       |
| TCRE | 31.8      | 0.43      | 4.06      | 2.53      | 0.45      | 18.2      | 2.05      | 22.6      | 13.4      | 4.44       |
| TCRF | 31        | 0.39      | 3.55      | 2.24      | 0.54      | 17.9      | 2.05      | 22.7      | 13.7      | 5.84       |
| TCRG | 32.2      | 0.42      | 4.02      | 2.48      | 0.47      | 17.9      | 2.13      | 22        | 13.6      | 4.78       |
| TCRH | 32.6      | 0.38      | 3.8       | 2.32      | 0.45      | 18        | 2.03      | 22.3      | 13.6      | 4.58       |

**C CD4 T cells**

|      | Cluster 1 | Cluster 2 | Cluster 3 | Cluster 4 | Cluster 5 | Cluster 6 | Cluster 7 | Cluster 8 | Cluster 9 |
|------|-----------|-----------|-----------|-----------|-----------|-----------|-----------|-----------|-----------|
| TCRA | 20.00     | 5.62      | 8.55      | 3.45      | 42.60     | 2.60      | 10.00     | 6.42      | 0.68      |
| TCRB | 19.90     | 5.23      | 8.86      | 3.61      | 42.40     | 2.75      | 10.20     | 6.30      | 0.71      |
| TCRC | 19.90     | 5.73      | 8.75      | 3.59      | 42.30     | 2.73      | 9.89      | 6.40      | 0.69      |
| TCRD | 19.30     | 5.41      | 8.65      | 3.66      | 42.90     | 2.74      | 10.10     | 6.44      | 0.72      |
| TCRE | 19.30     | 5.67      | 8.90      | 3.29      | 42.80     | 2.77      | 10.30     | 6.35      | 0.69      |
| TCRF | 20.30     | 5.61      | 8.44      | 3.41      | 42.40     | 2.32      | 10.20     | 6.67      | 0.68      |
| TCRG | 18.90     | 5.68      | 8.79      | 3.66      | 42.50     | 2.48      | 10.20     | 7.05      | 0.74      |
| TCRH | 19.10     | 5.48      | 8.94      | 3.53      | 42.60     | 2.44      | 10.10     | 7.09      | 0.68      |

**Figure S4. Quality control**

To preclude the possibility that differences among tubes were driving the clustering we checked whether each tube was equally represented within each cluster. **A)** As an example, the distribution of each tube is projected on the opt-SNE embedding of the CD8 T cells. The percentage of cells within each cluster represented by the different tubes are shown for **B)** the CD8 T cells and **C)** the CD4 T cells.

**A**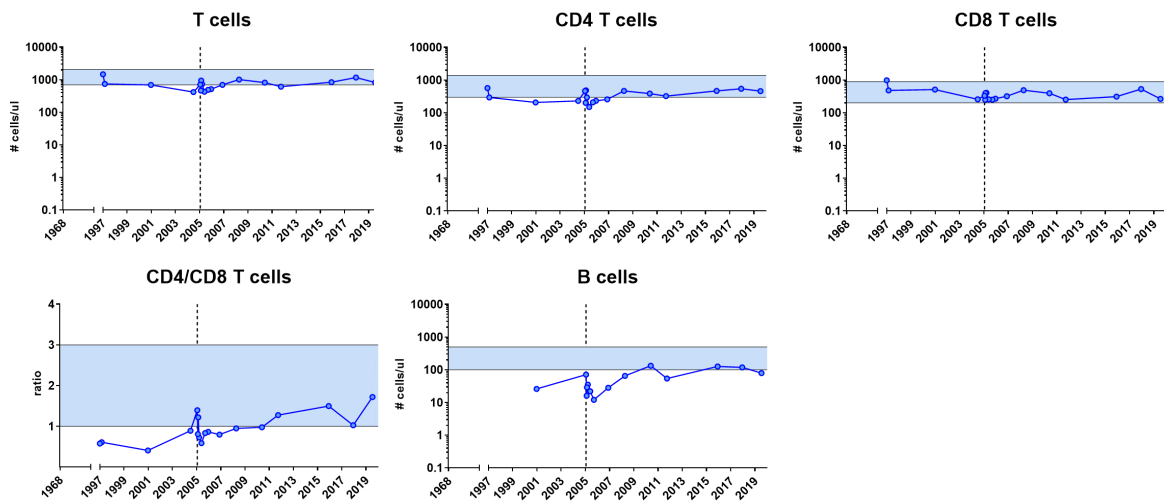**B**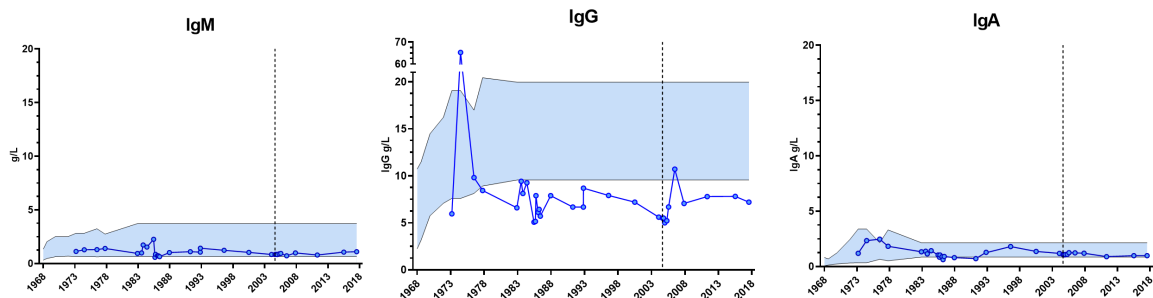**C**

|                   | Total B | Naive B | Unswitched memory B | Switched memory B |
|-------------------|---------|---------|---------------------|-------------------|
| 2001 (pre boost)  | 0%      |         |                     |                   |
| 2019 (post boost) |         | 29%     | 49%                 | 93%               |

**Figure S5. Immunological parameters UPN1**

**A)** Total T, CD4 T, CD8 T and B cells, and **B)** immunoglobulin levels measured as routine diagnostic tool. The dotted line represents the peripheral stem cell boost. **C)** Donor chimerism of B cells. Naive, unswitched memory and switched memory B cells were defined as  $CD19^+CD27^-IgD^+IgM^+$ ,  $CD19^+CD27^+IgD^+IgM^+$  and  $CD19^+CD27^+IgD^-IgM^-$ , respectively.

**A**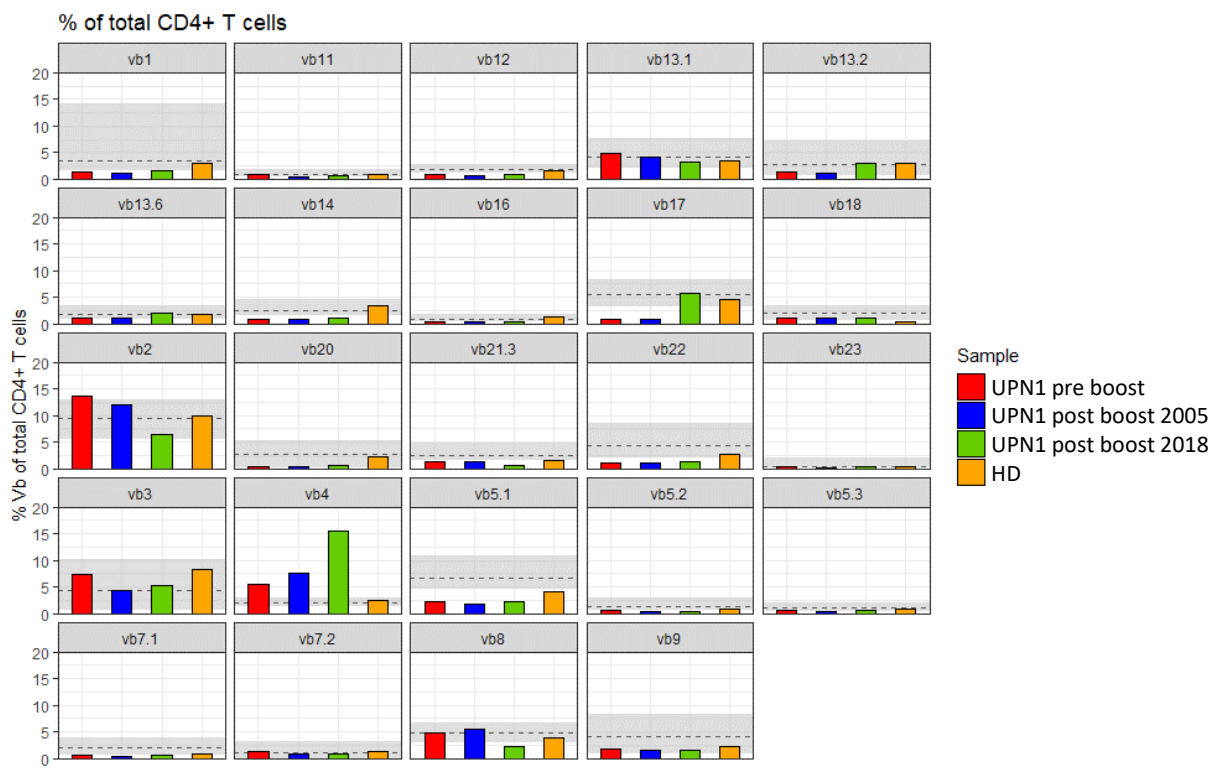**B**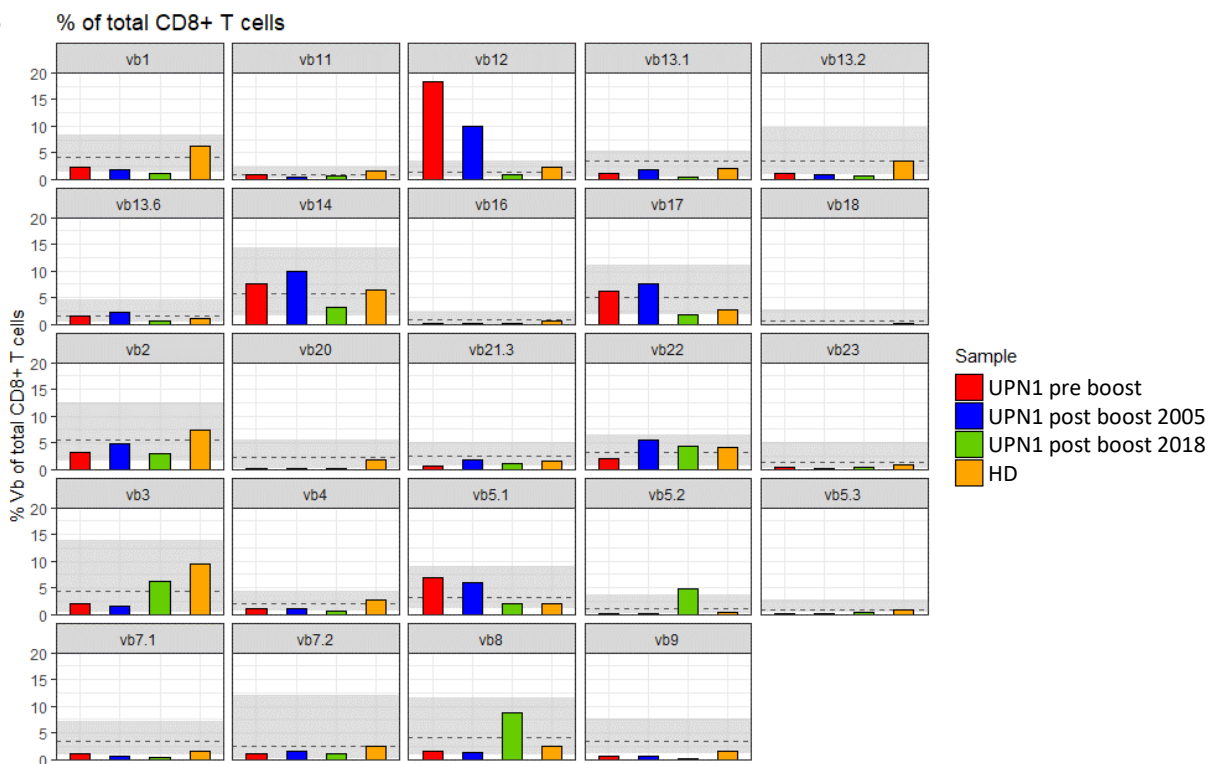

### Figure S6. Vβ frequency among total CD4 and CD8 T cells

For each individual sample the Vβ frequency is calculated as percentage of **A)** total CD4 T cells and **B)** total conventional CD8 T cells. The minimum and maximum reference values, measured among at least 46 healthy donors by the manufacturer of the Vβ antibody kit is indicated in grey. The dashed line indicates the mean reference value.

### Vβ13.2 (Cluster 5)

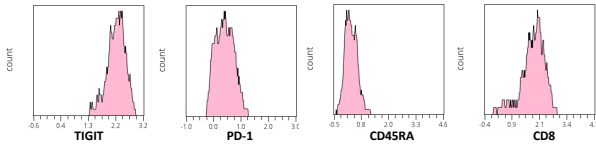

### Vβ17 (Cluster 7,17)

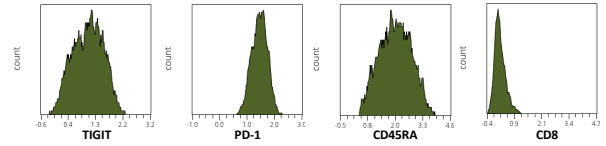

### Vβ4 (Cluster 8,10,22,2,21,26,11,12,16,18)

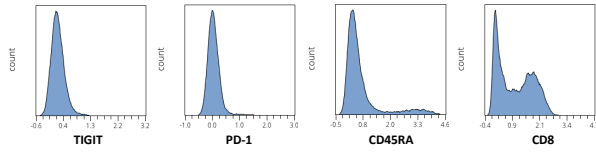

### Vβ8 (Cluster 11,12,16,18)

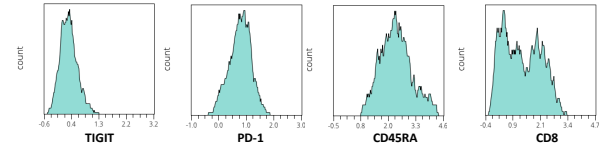

### Vβ2 (Cluster 4,9,6,13)

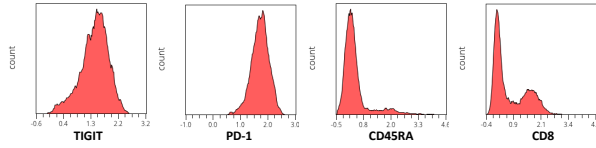

### Vβ13.6 (16,18)

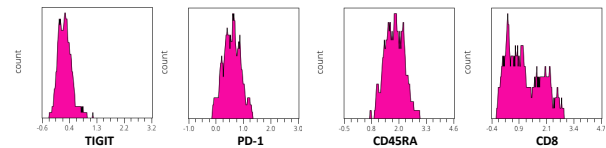

### Vβ18 (Cluster 1)

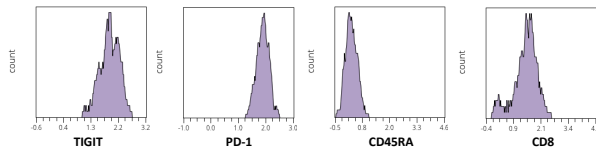

**Figure S7. Expression of TIGIT, PD-1, CD45RA and CD8 of enriched Vβ families within CD27<sup>-</sup> and/or CD28<sup>-</sup> memory CD4 population**

For each dominant Vβ an overlay histogram is shown of the clusters in which the Vβ family was enriched. The four samples (UPN1 pre boost, post boost 2005, post boost 2018 and healthy donor) were pooled.

### Vβ12 (Cluster 32,17,39)

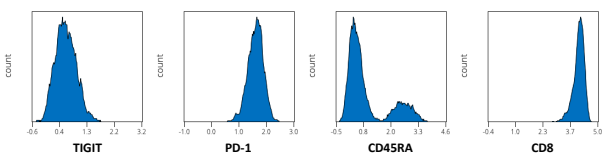

### Vβ13.2 (Cluster 12)

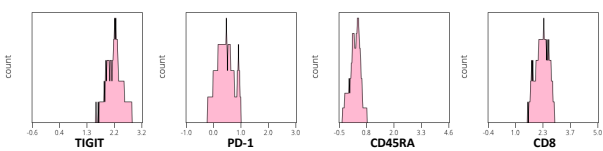

### Vβ21.3 (Cluster 12)

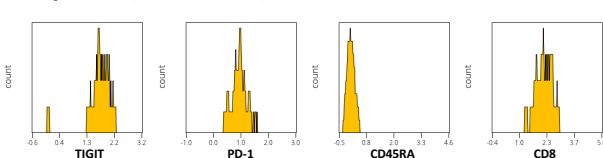

### Vβ22 (cluster 8)

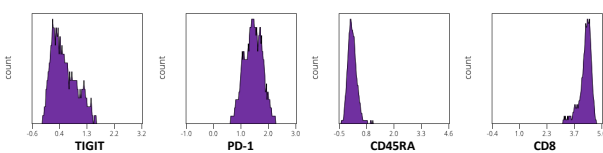

### Vβ22 (cluster 28,36,38)

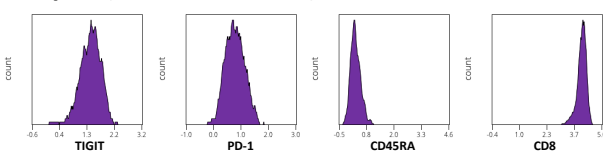

### Vβ17 (Cluster 35,24,20,21)

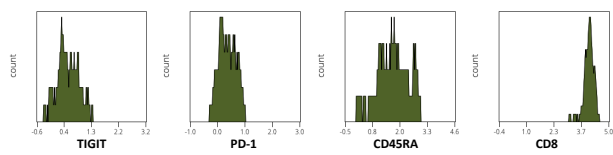

### Vβ14 (Cluster 35,24,20,21)

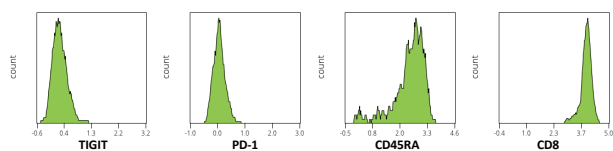

### Vβ3 (Cluster 35,24,20,21)

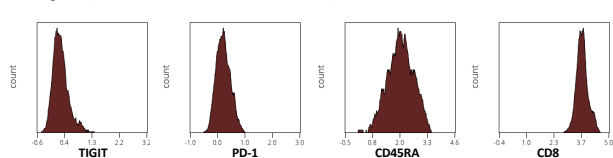

### Vβ8 (Cluster 16,23,9,5,6,11,4,10)

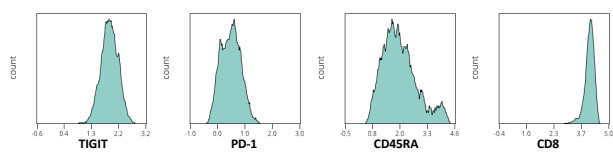

### Vβ5.2 (Cluster 9,5,6,11,4,10)

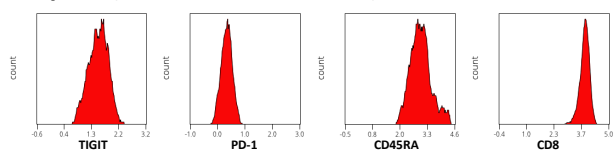

### Vβ11 (Cluster 33,31)

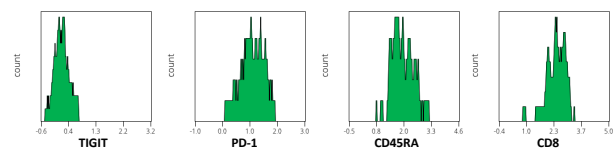

**Figure S8. Expression of TIGIT, PD-1, CD45RA and CD8 of enriched Vβ families within CD27<sup>-</sup> and/or CD28<sup>-</sup> memory CD8 T cell population**

For each dominant Vβ an overlay histogram is shown of the clusters in which the Vβ was enriched. The four samples (UPN1 pre boost, post boost 2005, post boost 2018 and healthy donor) were pooled.

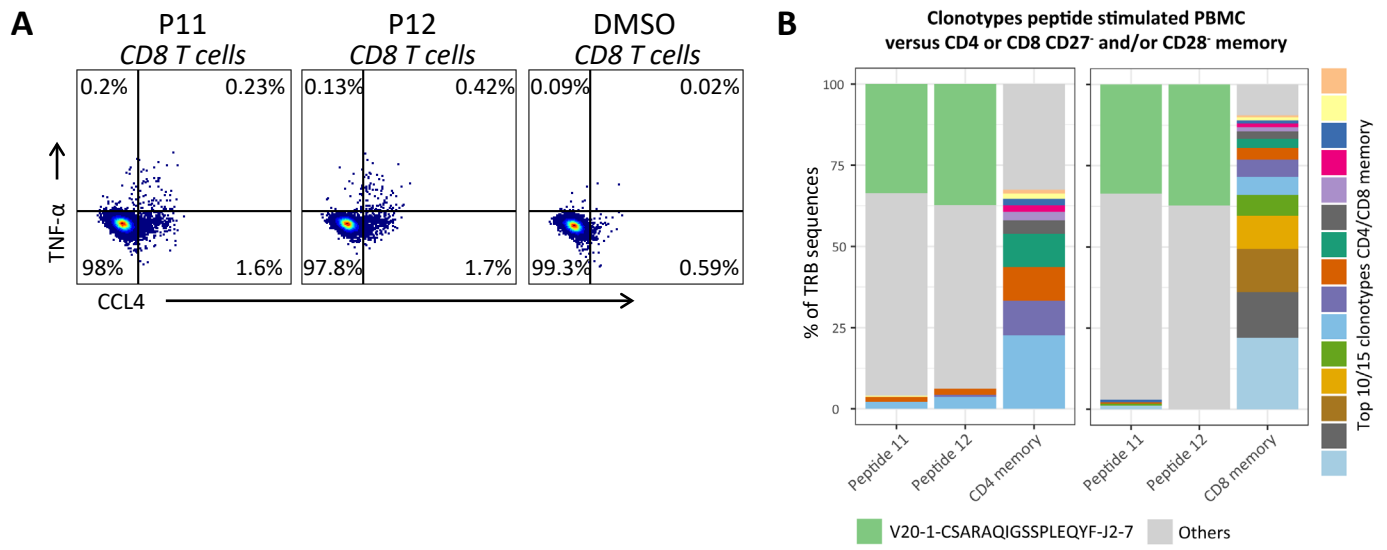

**Figure S9. HPV2-derived peptide stimulation of PBMC**

**A)** PBMC of UPN1 were cultured for 7 days with peptide 11 or peptide 12 (Table S2). The TNF- $\alpha$  and CCL4 production of CD8 T cells is shown. **B)** TRB sequencing results of PBMC of UPN1 cultured for 26 days with single peptide. Only clonotypes with at least 50 reads were included. The most frequent clonotype in both peptide cultures is depicted in green. The top 10/15 most frequent clonotypes of the sorted CD4 and CD8 memory populations, as indicated in Figure 7B are colored to show the overlap with the peptide cultured cells.
